# Supplementary material
Source: PubMed Central journal article supplement (PMC10257980)
Supplement: NIHMS1906135-supplement-supplementary.pdf [file NIHMS1906135-supplement-supplementary.pdf]

**Supplemental Table 1. List of covariates considered in the multivariable models for adult lung**

| <b>Covariate</b>                                         | <b>1-year mortality model</b> | <b>5-year mortality model conditional on survival to 1 year</b> | <b>5-year BOS/CLAD model conditional on survival to discharge</b> |
|----------------------------------------------------------|-------------------------------|-----------------------------------------------------------------|-------------------------------------------------------------------|
| Recipient age (years) (continuous)                       | x                             | x                                                               | x                                                                 |
| Recipient BMI (kg/m <sup>2</sup> ) (continuous)          | x                             | x                                                               | x                                                                 |
| Recipient diabetes (no, yes)                             | x                             | x                                                               | x                                                                 |
| Recipient history of smoking (no, yes)                   | x                             | -                                                               | x                                                                 |
| Recipient ECMO (no, yes)                                 | x                             | x                                                               | x                                                                 |
| Recipient ventilator (no, yes)                           | x                             | x                                                               | x                                                                 |
| Recipient hospitalized (no, yes)                         | x                             | x                                                               | x                                                                 |
| Recipient previous lung surgery (no, yes)                | x                             | x                                                               | x                                                                 |
| Recipient PRA (%) (continuous)                           | x                             | x                                                               | x                                                                 |
| Recipient GFR (mL/min/1.73 m <sup>2</sup> ) (continuous) | x                             | x                                                               | x                                                                 |
| Recipient total bilirubin (mg/dl) (continuous)           | x                             | x                                                               | x                                                                 |
| Recipient PA mean (mm/Hg) (continuous)                   | x                             | x                                                               | x                                                                 |
| Recipient PCW (mm/Hg) (continuous)                       | x                             | x                                                               | x                                                                 |
| Recipient PVR (wood units) (continuous)                  | x                             | x                                                               | x                                                                 |
| Donor age (years) (continuous)                           | x                             | x                                                               | x                                                                 |
| Donor cause of death (head trauma, anoxia, CVA, other)   | x                             | x                                                               | x                                                                 |
| DCD donor (no, yes)                                      | x                             | x                                                               | x                                                                 |
| Donor/recipient sex match (M/M, F/F, F/M, M/F)           | x                             | x                                                               | x                                                                 |
| Donor CMV+/recipient CMV- (no, yes)                      | x                             | x                                                               | x                                                                 |
| Ischemic time (hours) (continuous)                       | x                             | x                                                               | x                                                                 |
| Procedure type (double/bilateral, single)                | x                             | x                                                               | x                                                                 |
| Center volume in previous 3 years (continuous)           | x                             | x                                                               | x                                                                 |
| Transplant era (2000-2005, 2006-2011, 2012-2017)         | x                             | -                                                               | -                                                                 |
| Transplant era (1996-2001, 2002-2007, 2008-2013)         | -                             | x                                                               | x                                                                 |
